# Supplementary material
Source: MDPI journal article supplement (https://www.mdpi.com/2071-1050/7/7/9505)
Supplement: s1 [file s1]

# Land Assets, Access, Use and Change Questionnaire

**Questionnaire #:** \_\_\_\_\_

Interviewer: \_\_\_\_\_ Date: \_\_\_\_\_

Chiefdom: \_\_\_\_\_ Village: \_\_\_\_\_

Latitude: \_\_\_\_\_ Longitude: \_\_\_\_\_ Elevation: \_\_\_\_\_

## Personal Information

Respondent: \_\_\_\_\_ Age: \_\_\_\_\_

Gender: **Male** ☐ **Female** ☐

Marital Status: **Single** ☐ **Married** ☐ **Widow(er)** ☐ **Divorced** ☐

## Household Situation

### 1. How many people of different age groups are in this household?

| Age Group | Male | Female | Total (by AG) |
|-----------|------|--------|---------------|
| 0 – 5     |      |        |               |
| 6- 17     |      |        |               |
| 18 – 35   |      |        |               |
| 36 – 65   |      |        |               |
| >65       |      |        |               |

### 2. What is the highest level of education obtained by family members?

|          | None | Primary | Secondary | University |
|----------|------|---------|-----------|------------|
| Husband  |      |         |           |            |
| Wife     |      |         |           |            |
| Children |      |         |           |            |

### 3. Please rank your main sources of household income

|                   | Rank of Sources before 2008 | Rank of Sources at Present | Annual Income before 2008 | Annual Income at Present |
|-------------------|-----------------------------|----------------------------|---------------------------|--------------------------|
| Food crop farming | 1 2 3 4 5                   | 1 2 3 4 5                  |                           |                          |
| Cash crop farming | 1 2 3 4 5                   | 1 2 3 4 5                  |                           |                          |
| Petty trading     | 1 2 3 4 5                   | 1 2 3 4 5                  |                           |                          |
| Self-employed     | 1 2 3 4 5                   | 1 2 3 4 5                  |                           |                          |
| Animal husbandry  | 1 2 3 4 5                   | 1 2 3 4 5                  |                           |                          |
| Fishing           | 1 2 3 4 5                   | 1 2 3 4 5                  |                           |                          |
| NGO employed      | 1 2 3 4 5                   | 1 2 3 4 5                  |                           |                          |
| Local company     | 1 2 3 4 5                   | 1 2 3 4 5                  |                           |                          |
| Other:            | 1 2 3 4 5                   | 1 2 3 4 5                  |                           |                          |
| No income source  | 1 2 3 4 5                   | 1 2 3 4 5                  |                           |                          |

Most important rank is 5 and the least important rank is 1. Circle the appropriate rank in the boxes.

More than one activity applies.

### 4. For how long have you lived in this locality?

\_\_\_\_\_

### 5. During this period, for how long have you been practicing agriculture?

\_\_\_\_\_

## Land Assets, Use, Access and Change

**6. How has your land holdings (in acres) changed from 2008 to present?**

| <i>Size of holdings</i> | <i>Before 2008</i> | <i>At present</i> |
|-------------------------|--------------------|-------------------|
| <i>&lt;1</i>            |                    |                   |
| <i>1-5</i>              |                    |                   |
| <i>6-10</i>             |                    |                   |
| <i>10-25</i>            |                    |                   |
| <i>25-50</i>            |                    |                   |
| <i>50-100</i>           |                    |                   |
| <i>&gt;100</i>          |                    |                   |
| <i>Total Size</i>       |                    |                   |

***This should be specific to the respondent,  
not the household.***

*If the respondent is a woman, she should indicate separately how her specific land holdings have changed in this period. Not the land holdings of her family.*

***If both couples are present, they should indicate separately.***

**Family is the immediate family. Total for household will be from both household heads.**

**7. If your land holding situation has changed (in Q. 6), what were the main reasons for these changes?**

- a) I shared with my family members
- b) I sold to an individual or group
- c) I sold voluntarily to a company
- d) Taken for public service works by county or government
- e) Taken & compensated by county (without my agreement)
- f) Taken & compensated for by a company (with my agreement)
- g) Taken & not compensated by company (without my agreement)
- h) Taken & compensated by government (with my agreement)
- i) Taken & compensated by government (without my agreement)
- j) Taken & not compensated by government (without my agreement)
- k) Other: .....

1111111111111111

**8. Who made the decision or was contacted before the land tenure situation changed?**

- a) Myself ☐
- b) The state ☐
- c) Company ☐
- d) My partner ☐
- e) The land owner ☐
- f) Don't know ☐
- g) My family ☐
- h) The local chief ☐
- i) The district council ☐
- j) The District Officer ☐

**9. Were you aware of this transaction?**

Yes ☐ No ☐

**10. Did this involve your full consent & agreement?**

- a) Yes, I agreed fully ☐
- b) I agreed to different terms than were contracted ☐
- c) I was aware, did not want it, but could not stop it ☐
- d) I was never contacted on the transaction ☐

**11. What was your level of consent and agreement with the terms of the conditions that changed you land tenure situation?**

- a) I co-negotiated and agreed fully with the terms ☐
- b) I agreed to different terms than were written in the contract ☐
- c) I was aware, did not want it, but could not stop it ☐
- d) I was never contacted on the transaction ☐

**12. Who negotiated the price of the land transaction?**

- a) Myself ☐
- b) The state ☐
- c) Company ☐
- d) My family ☐
- e) My partner ☐
- f) The land owner ☐
- g) Don't know ☐
- h) The district council ☐
- i) The local chief ☐
- j) The District Officer ☐

**13. How was the land priced (was any price benchmark used)?**

- a) No pricing benchmark was used ☐
- b) Prevailing land prices as benchmarks ☐
- c) The price was determined by the state ☐
- d) Other: ..... ☐
- e) Don't know ☐

## Access and Use of Land Resources

### 14. Do you depend on forest resources for any portion of your livelihood?

Yes ☐ No ☐

### 15. If “Yes” above, what is the state of your use of forest resources?

| Resource                      | Land status<br>(a) | Time to reach<br>collection site<br>(b) | Who collects<br>the resource<br>(c) | Time spent on<br>collection trip<br>(d) | Frequency of<br>collection<br>(e) | Total collected<br>per year | % for own<br>consumption | % for<br>sale |
|-------------------------------|--------------------|-----------------------------------------|-------------------------------------|-----------------------------------------|-----------------------------------|-----------------------------|--------------------------|---------------|
| <i>Firewood (FW)</i>          |                    |                                         |                                     |                                         |                                   |                             |                          |               |
| <i>Timber (T)</i>             |                    |                                         |                                     |                                         |                                   |                             |                          |               |
| <i>Building Materials(BM)</i> |                    |                                         |                                     |                                         |                                   |                             |                          |               |
| <i>Water (W)</i>              |                    |                                         |                                     |                                         |                                   |                             |                          |               |
| <i>Animal Feed (F)</i>        |                    |                                         |                                     |                                         |                                   |                             |                          |               |
| <i>Medicinal Plants (MP)</i>  |                    |                                         |                                     |                                         |                                   |                             |                          |               |
| <i>Bushmeat (BU)</i>          |                    |                                         |                                     |                                         |                                   |                             |                          |               |
| <i>Straw (S)</i>              |                    |                                         |                                     |                                         |                                   |                             |                          |               |
| <i>Bamboo (B)</i>             |                    |                                         |                                     |                                         |                                   |                             |                          |               |
| <i>Palm wine (PW)</i>         |                    |                                         |                                     |                                         |                                   |                             |                          |               |
| <i>Wild oil palm (WOP)</i>    |                    |                                         |                                     |                                         |                                   |                             |                          |               |
| <i>Mushrooms (M)</i>          |                    |                                         |                                     |                                         |                                   |                             |                          |               |
| <i>Honey (H)</i>              |                    |                                         |                                     |                                         |                                   |                             |                          |               |

#### Legend

|          |                      |                      |                           |                       |                          |                  |
|----------|----------------------|----------------------|---------------------------|-----------------------|--------------------------|------------------|
| <b>a</b> | 1 = personal land    | 2 = community forest | 3 = state-owned land      | 4 = open-access       | 5 = don't know           |                  |
| <b>b</b> | 1 = less than 1 hour | 2 = 1 – 3 hours      | 3 = 3 – 6 hours           | 4 = more than 6 hours |                          |                  |
| <b>c</b> | 1 = husband          | 2 = wife             | 3 = sons                  | 4 = daughter          | 5 = all children         | 6 = whole family |
| <b>d</b> | 1 = less than 1 hour | 2 = 1 – 3 hours      | 3 = 3 – 6 hours           | 4 = more than 6 hours |                          |                  |
| <b>e</b> | 1 = every day        | 2 = weekly           | 3 = several times a month | 4 = monthly           | 5 = several times a year | 6 = yearly       |



**20. What is the nature of their employment?**

- a) Permanent ☐
- b) Contractual ☐ Length of contract: \_\_\_\_\_
- c) Seasonal ☐ Number of month/year: \_\_\_\_\_
- d) Part-time ☐ Average # of months/year: \_\_\_\_\_
- e) Casual labour ☐ Tasks: \_\_\_\_\_

**21. Daily wage:** \_\_\_\_\_**22. Annual income from the above employment:** \_\_\_\_\_**23. Has the presence of these companies facilitated access to agriculture-related inputs for your own food production?**Yes ☐ No ☐**24. If yes, indicate these inputs.**

- |                        |                          |                           |                          |
|------------------------|--------------------------|---------------------------|--------------------------|
| a) Organic fertilizers | <input type="checkbox"/> | d) Inorganic fertilizers  | <input type="checkbox"/> |
| b) Pesticides          | <input type="checkbox"/> | e) Water (for irrigation) | <input type="checkbox"/> |
| c) High quality seeds  | <input type="checkbox"/> | f) Other: .....           | <input type="checkbox"/> |

**25. Has the presence of these companies provided an opportunity for you to learn new techniques of agriculture for your own food production?**Yes ☐ No ☐**26. If yes, which types of techniques have been learned?**

- |                                      |                          |                                       |                          |
|--------------------------------------|--------------------------|---------------------------------------|--------------------------|
| a) New farm preparation methods      | <input type="checkbox"/> | d) Preparation of organic fertilizers | <input type="checkbox"/> |
| b) Techniques for food conservation  | <input type="checkbox"/> | e) Other: .....                       | <input type="checkbox"/> |
| c) Techniques for water conservation | <input type="checkbox"/> | f) Other: .....                       | <input type="checkbox"/> |

**27. Has the presence of these companies provided an opportunity for you to access or use new agricultural technology for your own food production?**Yes ☐ No ☐**28. If yes, which types of technologies can be accessed more easily?**

- |                                        |                          |                                               |                          |
|----------------------------------------|--------------------------|-----------------------------------------------|--------------------------|
| a) New farm preparation tools          | <input type="checkbox"/> | d) Better fertilizer application technologies | <input type="checkbox"/> |
| b) Access to tractors for farm use     | <input type="checkbox"/> | e) Technologies for food conservation         | <input type="checkbox"/> |
| c) Technologies for water conservation | <input type="checkbox"/> | f) Other: .....                               | <input type="checkbox"/> |

**29. Has the presence of these companies provided an opportunity for you to learn new skills of any livelihood activity for the benefit of your family?**Yes ☐ No ☐

**30. If yes, which types of technologies can be accessed more easily?**

- |                                         |                          |                                 |                          |
|-----------------------------------------|--------------------------|---------------------------------|--------------------------|
| a) New farm preparation skills          | <input type="checkbox"/> | d) Skills in water conservation | <input type="checkbox"/> |
| b) Skills in food conservation          | <input type="checkbox"/> | e) Other: .....                 | <input type="checkbox"/> |
| c) New skills of fertilizer application | <input type="checkbox"/> | d) Other: .....                 | <input type="checkbox"/> |

**31. Have there been changes in the yield of some of your major crops?**

Yes ☐ No ☐ Uncertain ☐

**32. If yes, can you attribute some or all of these changes to the presence of land related companies in your community?**

Yes ☐ No ☐ Uncertain ☐

**Food Security****33. How has the food production situation changed for your family since the coming of the company?**

- |                                                                          |                          |
|--------------------------------------------------------------------------|--------------------------|
| a) We now produce more food than we used to do                           | <input type="checkbox"/> |
| b) We now produce less food than we used to do                           | <input type="checkbox"/> |
| c) The variety of crops we produce has fallen as a result of the company | <input type="checkbox"/> |
| d) We now have more diversified food resources than we used to do        | <input type="checkbox"/> |

**34. Which of the following problems directly affect food production situation in your family?**

|                                               | Often                    | Sometimes                | Rarely                   | Rank ( <i>circle correct rank</i> ) |   |   |   |   |
|-----------------------------------------------|--------------------------|--------------------------|--------------------------|-------------------------------------|---|---|---|---|
| a) Lack of capital                            | <input type="checkbox"/> | <input type="checkbox"/> | <input type="checkbox"/> | 1                                   | 2 | 3 | 4 | 5 |
| b) Insufficient land                          | <input type="checkbox"/> | <input type="checkbox"/> | <input type="checkbox"/> | 1                                   | 2 | 3 | 4 | 5 |
| c) Lack of labour                             | <input type="checkbox"/> | <input type="checkbox"/> | <input type="checkbox"/> | 1                                   | 2 | 3 | 4 | 5 |
| d) Health issues                              | <input type="checkbox"/> | <input type="checkbox"/> | <input type="checkbox"/> | 1                                   | 2 | 3 | 4 | 5 |
| f) No clear land status                       | <input type="checkbox"/> | <input type="checkbox"/> | <input type="checkbox"/> | 1                                   | 2 | 3 | 4 | 5 |
| g) Difficulties accessing quality seed        | <input type="checkbox"/> | <input type="checkbox"/> | <input type="checkbox"/> | 1                                   | 2 | 3 | 4 | 5 |
| h) Difficulties accessing fertilizer          | <input type="checkbox"/> | <input type="checkbox"/> | <input type="checkbox"/> | 1                                   | 2 | 3 | 4 | 5 |
| i) Fertilizer is too expensive                | <input type="checkbox"/> | <input type="checkbox"/> | <input type="checkbox"/> | 1                                   | 2 | 3 | 4 | 5 |
| j) Difficulties selling agricultural products | <input type="checkbox"/> | <input type="checkbox"/> | <input type="checkbox"/> | 1                                   | 2 | 3 | 4 | 5 |
| k) Destruction by animals (birds, insects)    | <input type="checkbox"/> | <input type="checkbox"/> | <input type="checkbox"/> | 1                                   | 2 | 3 | 4 | 5 |
| l) Farm gate price is very low                | <input type="checkbox"/> | <input type="checkbox"/> | <input type="checkbox"/> | 1                                   | 2 | 3 | 4 | 5 |
| m) Lack of technology information             | <input type="checkbox"/> | <input type="checkbox"/> | <input type="checkbox"/> | 1                                   | 2 | 3 | 4 | 5 |
| n) Lack of water for agriculture              | <input type="checkbox"/> | <input type="checkbox"/> | <input type="checkbox"/> | 1                                   | 2 | 3 | 4 | 5 |
| o) Floods                                     | <input type="checkbox"/> | <input type="checkbox"/> | <input type="checkbox"/> | 1                                   | 2 | 3 | 4 | 5 |
| p) Drought                                    | <input type="checkbox"/> | <input type="checkbox"/> | <input type="checkbox"/> | 1                                   | 2 | 3 | 4 | 5 |
| q) Land conflict with company                 | <input type="checkbox"/> | <input type="checkbox"/> | <input type="checkbox"/> | 1                                   | 2 | 3 | 4 | 5 |
| r) Soil fertility decline                     | <input type="checkbox"/> | <input type="checkbox"/> | <input type="checkbox"/> | 1                                   | 2 | 3 | 4 | 5 |
| s) Problems of soil erosion                   | <input type="checkbox"/> | <input type="checkbox"/> | <input type="checkbox"/> | 1                                   | 2 | 3 | 4 | 5 |
| t) Rainfall associated problems               | <input type="checkbox"/> | <input type="checkbox"/> | <input type="checkbox"/> | 1                                   | 2 | 3 | 4 | 5 |
| u) Other: .....                               | <input type="checkbox"/> | <input type="checkbox"/> | <input type="checkbox"/> | 1                                   | 2 | 3 | 4 | 5 |

**35. How would you describe the contribution of the company in this community?**

- a) An opportunity to provide economic development to this region ☐
- b) An opportunity to provide needed infrastructure in this area ☐
- c) An opportunity to improve my family's economic situation ☐
- d) An opportunity that benefits people not resident in the area ☐
- e) An opportunity that benefits rich people only of this area ☐
- f) We see very limited benefits from such large-scale land use ☐
- g) We see no benefits from such large-scale land use ☐
- h) We feel less food secure as a result of the presence of these companies ☐
- i) These companies have contributed in impoverishing us ☐
- j) Our community is now more lawless than before ☐
- k) Our access to local resources has been impeded ☐
- l) Other: ..... ☐

**36. Are you happy with the company operating in your community or are you not?**

- a) I am happy with the company operating in our community ☐
- a) I am not happy with the company operating in our community ☐

**37. Would you want the company to continue operations in your community or not?**

- b) Yes, I want to company to continue operations in our community ☐
- c) No, I do not want to company to continue operations in our community ☐

**38. What in your opinion should be the future of land investment companies in this area?**

- a) They should continue their work - it is important for us ☐
- b) They should meet the promises they made to the community ☐
- c) They should employ more of us in their activities ☐
- d) They should hand back the lands and leave ☐
- e) They should take part of the land and leave some for us ☐
- f) They should respect local authority ☐
- g) Other: ..... ☐
- h) Other: ..... ☐
- i) Other: ..... ☐
