# Supplementary material
Source: MDPI journal article supplement (https://www.mdpi.com/2071-1050/7/7/9505)
Supplement: s2 [file s2]

**HOUSEHOLD FOOD-SECURITY/HUNGER SURVEY MODULE  
(3-STAGE DESIGN - 2 INTERNAL SCREENERS)**

Village: \_\_\_\_\_ Date: \_\_\_\_\_

Respondent: \_\_\_\_\_ Age: \_\_\_\_\_

Latitude: \_\_\_\_\_ Longitude: \_\_\_\_\_

These next questions are about the food eaten in your household in the last 12 months, since (current month) of last year, and whether you were able to afford the food you need. [Note: Question 2 is for the last 3 years]

**General food sufficiency question/screener: Questions 1, 1a, 1b (OPTIONAL: These questions are NOT used in calculating the food-security/hunger scale.)**

1. [IF ONE PERSON IN HOUSEHOLD, USE "I" IN PARENTHETICALS, OTHERWISE, USE "WE."]

Which of these statements best describes the food eaten in your household in the last 12 months: --enough of the kinds of food (I/we) want to eat; --enough, but not always the kinds of food (I/we) want; --sometimes not enough to eat; or, --often not enough to eat?

- ☐ Enough of the kinds of food we want to eat [SKIP 1a and 1b]
- ☐ Enough but not always the kinds of food we want [SKIP 1a; ask 1b]
- ☐ Sometimes not enough to eat [Ask 1a; SKIP 1b]
- ☐ Often not enough [Ask 1a; SKIP 1b]
- ☐ DK or Refused [SKIP 1a and 1b]

1a. [IF OPTION 3 OR 4 SELECTED, ASK] Here are some reasons why people don't always have enough to eat. For each one, please tell me if that is a reason why YOU don't always have enough to eat. [READ LIST. MARK ALL THAT APPLY.]

**YES    NO    DK**

- |                          |                          |                          |                                                    |
|--------------------------|--------------------------|--------------------------|----------------------------------------------------|
| <input type="checkbox"/> | <input type="checkbox"/> | <input type="checkbox"/> | Not enough food produced from last harvest         |
| <input type="checkbox"/> | <input type="checkbox"/> | <input type="checkbox"/> | Not enough land on which to produce food           |
| <input type="checkbox"/> | <input type="checkbox"/> | <input type="checkbox"/> | No land at all to produce our food                 |
| <input type="checkbox"/> | <input type="checkbox"/> | <input type="checkbox"/> | Too hard to get to the market                      |
| <input type="checkbox"/> | <input type="checkbox"/> | <input type="checkbox"/> | Not enough money for food                          |
| <input type="checkbox"/> | <input type="checkbox"/> | <input type="checkbox"/> | Not able to cook or eat because of health problems |

1b. [IF OPTION 2 SELECTED, ASK] Here are some reasons why people don't always have the quality or variety of food they want. For each one, please tell me if that is a reason why YOU don't always have the kinds of food you want to eat. [READ LIST. MARK ALL THAT APPLY.]

**YES    NO    DK**

- |                          |                          |                          |                                                      |
|--------------------------|--------------------------|--------------------------|------------------------------------------------------|
| <input type="checkbox"/> | <input type="checkbox"/> | <input type="checkbox"/> | Not enough money for food                            |
| <input type="checkbox"/> | <input type="checkbox"/> | <input type="checkbox"/> | Not enough land to produce the kinds of food we like |
| <input type="checkbox"/> | <input type="checkbox"/> | <input type="checkbox"/> | No land at all to produce the types of food we like  |
| <input type="checkbox"/> | <input type="checkbox"/> | <input type="checkbox"/> | Too hard to get to the market                        |
| <input type="checkbox"/> | <input type="checkbox"/> | <input type="checkbox"/> | On a special diet                                    |

**Stage 1: Questions 2-7 --ask all households:**

[IF SINGLE ADULT IN HOUSEHOLD, USE "I," "MY," AND "YOU" IN PARENTHETICALS; OTHERWISE, USE "WE," "OUR," AND "YOUR HOUSEHOLD;" IF UNKNOWN OR AMBIGUOUS, USE PLURAL FORMS.]

2. Now I'm going to read you several statements that people have made about their food situation. For these statements, please tell me whether the statement was often true, sometimes true, or never true for (you/your household) in the last 3 years.

The first statement is "(I/We) worried whether (my/our) food would run out before (I/we) the next harvest season." Was that often true, sometimes true, or never true for (you/your household) in the last 12 months?

- ☐ Often true
- ☐ Sometimes true
- ☐ Never true
- ☐ DK or R

3. Now I'm going to read you several statements that people have made about their food situation. For these statements, please tell me whether the statement was often true, sometimes true, or never true for (you/your household) in the last 12 months, that is, since last (name of current month).

The first statement is "(I/We) worried whether (my/our) food would run out before (I/we) got money to buy more." Was that often true, sometimes true, or never true for (you/your household) in the last 12 months?

- ☐ Often true
- ☐ Sometimes true
- ☐ Never true
- ☐ DK or R

4. "The food that (I/we) bought just didn't last, and (I/we) didn't have money to get more." Was that often, sometimes, or never true for (you/your household) in the last 12 months?

- ☐ Often true
- ☐ Sometimes true
- ☐ Never true
- ☐ DK or R

5. "(I/we) couldn't afford to eat balanced meals." Was that often, sometimes, or never true for (you/your household) in the last 12 months?

- ☐ Often true
- ☐ Sometimes true
- ☐ Never true
- ☐ DK or R

[IF CHILDREN UNDER 18 IN HOUSEHOLD, ASK Q6 - 7; OTHERWISE SKIP TO 1st-Level Screen.]

6. "(I/we) relied on only a few kinds of low-cost food to feed (my/our) child/the children) because (I was/we were) running out of money to buy food." Was that often, sometimes, or never true for (you/your household) in the last 12 months?

- ☐ Often true
- ☐ Sometimes true
- ☐ Never true

☐ DK or R

7. "(I/We) couldn't feed (my/our) child/the children) a balanced meal, because (I/we) couldn't afford that." Was that often, sometimes, or never true for (you/your household) in the last 12 months?

☐ Often true  
☐ Sometimes true  
☐ Never true  
☐ DK or R

**1st-level Screen: If AFFIRMATIVE RESPONSE to ANY ONE of Questions 3-7 (i.e., "often true" or "sometimes true") OR response [3] or [4] to Question 1 (if administered), then continue to Stage 2; otherwise, skip to end.**

**Stage 2: Questions 8-12 --ask households passing the 1st-level Screen.**

[IF CHILDREN UNDER 18 IN HOUSEHOLD, ASK Q8; OTHERWISE SKIP TO Q9]

8. "(My/Our child was/The children were) not eating enough because (I/we) just couldn't afford enough food." Was that often, sometimes, or never true for (you/your household) in the last 12 months?

☐ Often true  
☐ Sometimes true  
☐ Never true  
☐ DK or R

9. In the last 12 months, since last (name of current month), did (you/you or other adults in your household) ever cut the size of your meals or skip meals because there wasn't enough money for food?

☐ Yes  
☐ No (SKIP 9a)  
☐ DK or R (SKIP 9a)

- 9a. [IF YES ABOVE, ASK] How often did this happen---almost every month, some months but not every month, or in only 1 or 2 months?

☐ Almost every month  
☐ Some months but not every month  
☐ Only 1 or 2 months  
☐ DK or R

10. In the last 12 months, did you ever eat less than you felt you should because there wasn't enough money to buy food?

☐ Yes  
☐ No  
☐ DK or R

11. In the last 12 months, were you every hungry but didn't eat because you couldn't afford enough food?

☐ Yes

- ☐ No
- ☐ DK or R

12. In the last 12 months, did you lose weight because you didn't have enough money for food?

- ☐ Yes
- ☐ No
- ☐ DK or R

**2nd-level Screen (screener for Stage 3): If AFFIRMATIVE RESPONSE to ANY ONE of Questions 8 through 12, then continue to Stage 3; otherwise, skip to end.**

**Stage 3: Questions 13-17 --ask households passing the 2nd-level Screen.**

13. In the last 12 months, did (you/you or other adults in your household) ever not eat for a whole day because there wasn't enough money for food?

- ☐ Yes
- ☐ No (SKIP 13a)
- ☐ DK or R (SKIP 13a)

13a. [IF YES ABOVE, ASK] How often did this happen---almost every month, some months but not every month, or in only 1 or 2 months?

- ☐ Almost every month
- ☐ Some months but not every month
- ☐ Only 1 or 2 months
- ☐ DK or R

[IF CHILDREN UNDER 18 IN HOUSEHOLD, ASK 14-17; OTHERWISE SKIP TO END.]

14. The next questions are about children living in the household who are under 18 years old. In the last 12 months, since (current month) of last year, did you ever cut the size of (your child's/any of the children's) meals because there wasn't enough money for food?

- ☐ Yes
- ☐ No
- ☐ DK or R

15. In the last 12 months, did (CHILD'S NAME/any of the children) ever skip meals because there wasn't enough money for food?

- ☐ Yes
- ☐ No (SKIP 15a)
- ☐ DK or R (SKIP 15a)

15a. [IF YES ABOVE ASK] How often did this happen---almost every month, some months but not every month, or in only 1 or 2 months?

- ☐ Almost every month
- ☐ Some months but not every month
- ☐ Only 1 or 2 months
- ☐ DK or R

16. In the last 12 months, (was your child/ were the children) ever hungry but you just couldn't afford more food?
- ☐ Yes  
☐ No  
☐ DK or R
17. In the last 12 months, did (your child/any of the children) ever not eat for a whole day because there wasn't enough money for food?
- ☐ Yes  
☐ No  
☐ DK or R
18. *Amount farming at present \_\_\_\_ (acres)*

**Thank You.**
